# Supplementary material for: Multiple switchable circularly polarized luminescence from nucleotide/terbium(iii) complexes
Source: Royal Society of Chemistry journal article supplement (doi:10.1039/d2nj06145g), 2023-01-01
Supplement: d2nj06145g1.pdf [file d2nj06145g1.pdf]

## Supporting Information

### Multiple Switchable Circularly Polarized Luminescence from Nucleotide/Terbium (III) Complexes

Chujing Yang,<sup>a,b</sup> Zhiwei Zhang,<sup>b</sup> Jingqi Chen,<sup>b,c</sup> Xinying Zhang,<sup>b</sup> Yankai Dai,<sup>b</sup> Xuyi Li,<sup>d</sup> Yingying Chen,<sup>b</sup>  
Jiaqiang Xu,<sup>a,d,\*</sup> Lingyan Feng<sup>b,\*</sup>

- a. School of Medicine, Shanghai University, Shanghai 200444, China.
- b. Materials Genome Institute, and Department of Chemistry, College of Sciences, Shanghai University, Shanghai 200444, China. E-mail: [lingyanfeng@t.shu.edu.cn](mailto:lingyanfeng@t.shu.edu.cn).
- c. Institute of Molecular Medicine (IMM), Shanghai Jiao Tong University School of Medicine Shanghai Jiao Tong University, Shanghai 200240, China.
- d. NEST Lab, Department of Chemistry, College of Science, Shanghai University, Shanghai, 200444, China.

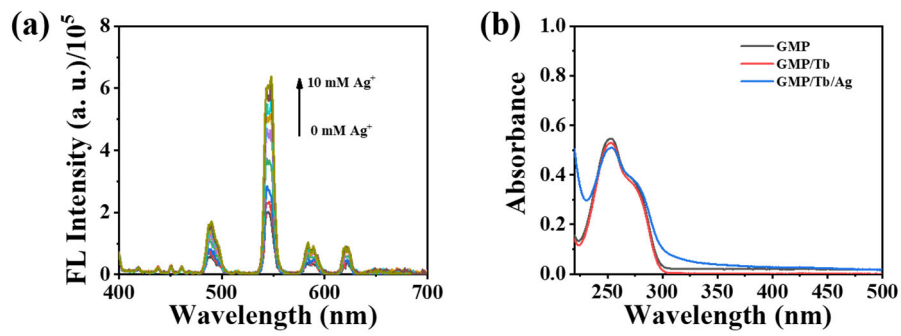

Fig. S1 (a) Fluorescence spectra of GMP/Tb CPNs with different concentrations of  $\text{Ag}^+$  (the solution was diluted 50 times,  $\lambda_{\text{ex}} = 236$  nm). (b) UV-vis spectra of GMP solution, GMP/Tb and GMP/Tb/Ag CPNs (the solution was diluted 400 times).

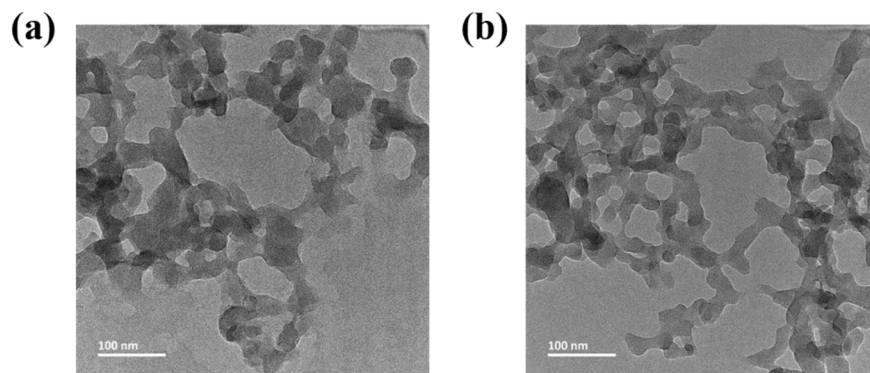

Fig. S2 TEM images of (a) GMP/Tb CPNs and (b) GMP/Tb/Ag CPNs.

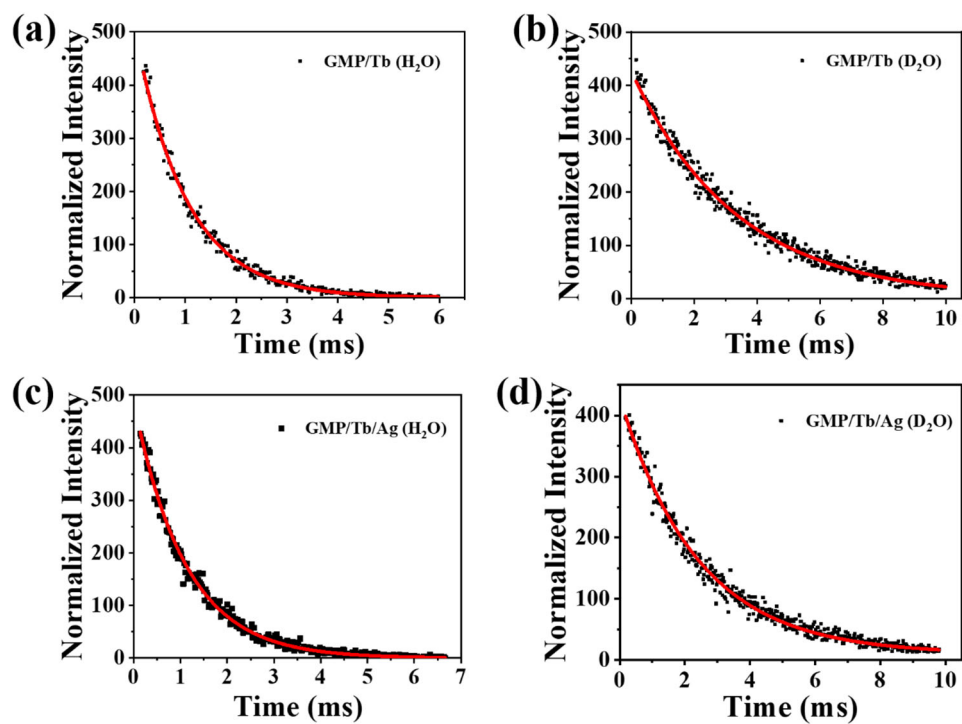

Fig. S3 Luminescence decay curves of (a) GMP/Tb in  $H_2O$  dispersion, (b) GMP/Tb in  $D_2O$  dispersion, (c) GMP/Tb/Ag in  $H_2O$  dispersion and (d) GMP/Tb/Ag in  $D_2O$  dispersion. The decay curves were fitted with double exponential curves (in red).

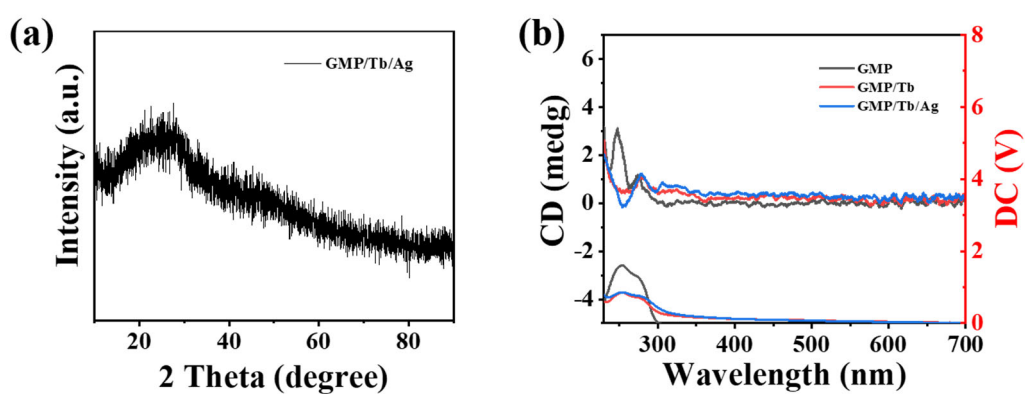

Fig. S4 (a) XRD of GMP/Tb/Ag CPNs. (b) CD spectra of GMP, GMP/Tb and GMP/Tb/Ag CPNs.

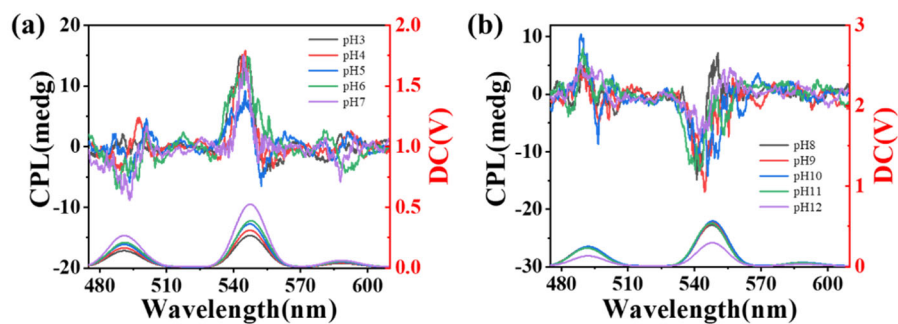

Fig. S5 (a) CPL of GMP/Tb/Ag CPNs in acidic and neutral conditions (pH 3-7). (b) CPL of GMP/Tb/Ag CPNs in alkaline conditions (pH 8-12) ( $\lambda_{\text{ex}} = 236 \text{ nm}$ ).

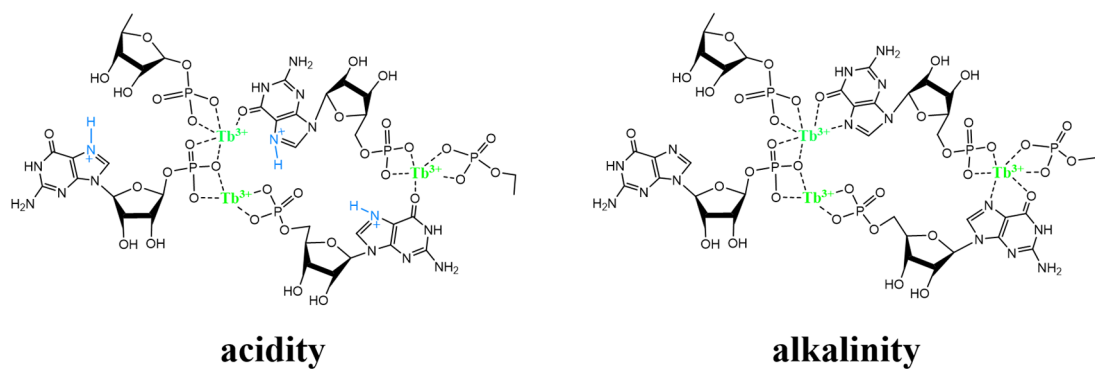

Fig. S6. Schematic diagram of the presumed coordination at acidity and alkalinity.

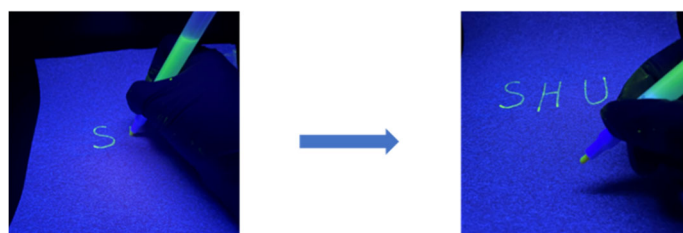

Fig. S7 Wrote the abbreviation of Shanghai University with a pen under 254 nm UV light.
